# Supplementary material
Source: Copernicus journal article supplement (doi:10.5194/egusphere-2026-1443)
Supplement: Supplementary file [file egusphere-2026-1443-AC1-supplement.pdf]

|                                     | t-statistic | Two-tailed t-test |             | One-tailed t-test |             |
|-------------------------------------|-------------|-------------------|-------------|-------------------|-------------|
|                                     |             | p-value           | Outcome     | p-value           | Outcome     |
| <b>Rannoch Moor</b>                 | 0.708       | 0.5047            | P> $\alpha$ | 0.2523            | P> $\alpha$ |
| <b>Chironico</b>                    | -0.3905     | 0.7055            | P> $\alpha$ | 0.3526            | P> $\alpha$ |
| <b>NENA</b>                         | -1.0056     | 0.341             | P> $\alpha$ | 0.1705            | P> $\alpha$ |
| <b>Global Primary</b>               | -1.658      | 0.1319            | P> $\alpha$ | 0.06595           | P> $\alpha$ |
| <b>Glen Roy</b>                     | -10.1292    | 0.008008          | P< $\alpha$ | 0.01602           | P< $\alpha$ |
| <b>Isle of Skye &amp; Highlands</b> | -4.9541     | 0.0009012         | P< $\alpha$ | 0.0004506         | P< $\alpha$ |
| <b>Mt. Billingen</b>                | -4.4733     | 0.001622          | P< $\alpha$ | 0.0008112         | P< $\alpha$ |
| <b>Norway</b>                       | -7.3182     | 0.0002288         | P< $\alpha$ | 0.0001144         | P< $\alpha$ |
| <b>Patagonia</b>                    | 1.4544      | 0.1799            | P> $\alpha$ | 0.08997           | P> $\alpha$ |
| <b>New Zealand</b>                  | -0.2864     | 0.7887            | P> $\alpha$ | 0.3943            | P> $\alpha$ |
| <b>Quelccaya</b>                    | 0.1412      | 0.8909            | P> $\alpha$ | 0.5546            | P> $\alpha$ |
